# Supplementary material for: 5T4-specific chimeric antigen receptor modification promotes the immune efficacy of cytokine-induced killer cells against nasopharyngeal carcinoma stem cell-like cells
Source: PubMed Central journal article supplement (PMC5501797; doi:10.1038/s41598-017-04756-9), 2017-07-07
Supplement: 41598_2017_4756_MOESM3_ESM.pdf [file 41598_2017_4756_MOESM3_ESM.pdf]

## **Supplementary Information for**

“5T4-specific chimeric antigen receptor modification promotes the immune efficacy of cytokine-induced killer cells against nasopharyngeal carcinoma stem cell-like cells”

Xueyang Guo<sup>1</sup>, Hang Zheng<sup>2</sup>, Weiren Luo<sup>1,3</sup>, Qianbing Zhang<sup>1</sup>, Jingxian Liu<sup>1</sup> and Kaitai Yao<sup>1,\*</sup>

<sup>1</sup>Guangdong Provincial Key Laboratory of Cancer Immunotherapy and Guangzhou Key Laboratory of Tumour Immunology Research, Cancer Research Institute, Southern Medical University, Guangzhou, China; <sup>2</sup>Department of Oncology, Nanfang Hospital, Southern Medical University, Guangzhou, China; <sup>3</sup>Department of Pathology, Shenzhen Third People's Hospital, Shenzhen University, Shenzhen, China

\* Corresponding author: Kaitai Yao

E-mail: [yao.kitai@hotmail.com](mailto:yao.kitai@hotmail.com)

Work telephone Numbers: +86 20 6164 8225

Postal address: Room 308, Life-Science Building, Southern Medical University, No.1023, Shatai South Road, Baiyun District, Guangzhou City, Guangdong Province, China

Postal code: 510515

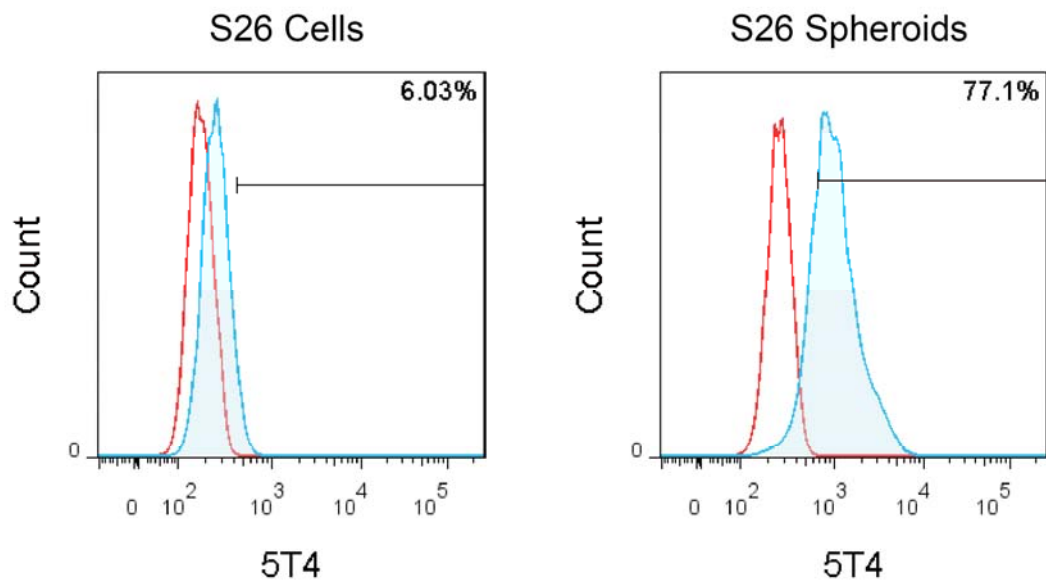

**Supplementary Figure S1. Flow cytometry analysis of membranous 5T4 expression on S26 spheroid cells and the parental cells.** Cells were stained with APC-conjugated anti-h5T4 antibody or matched isotype control antibody. Typical flow plots are shown.

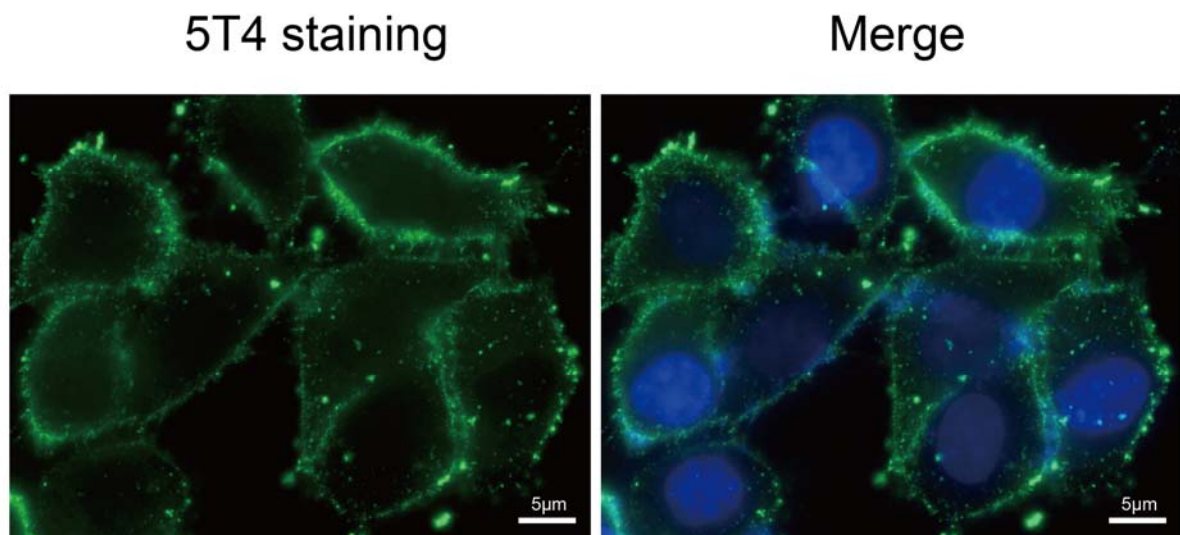

**Supplementary Figure S2. Immunofluorescence analysis of the cellular distribution of 5T4 in NPC.** SUNE1 cells were stained with 5T4 primary antibody followed by FITC-conjugated anti-rabbit secondary antibody and counterstained with DAPI. A typical image of 5T4 staining (a) and a merged picture (b) are shown.

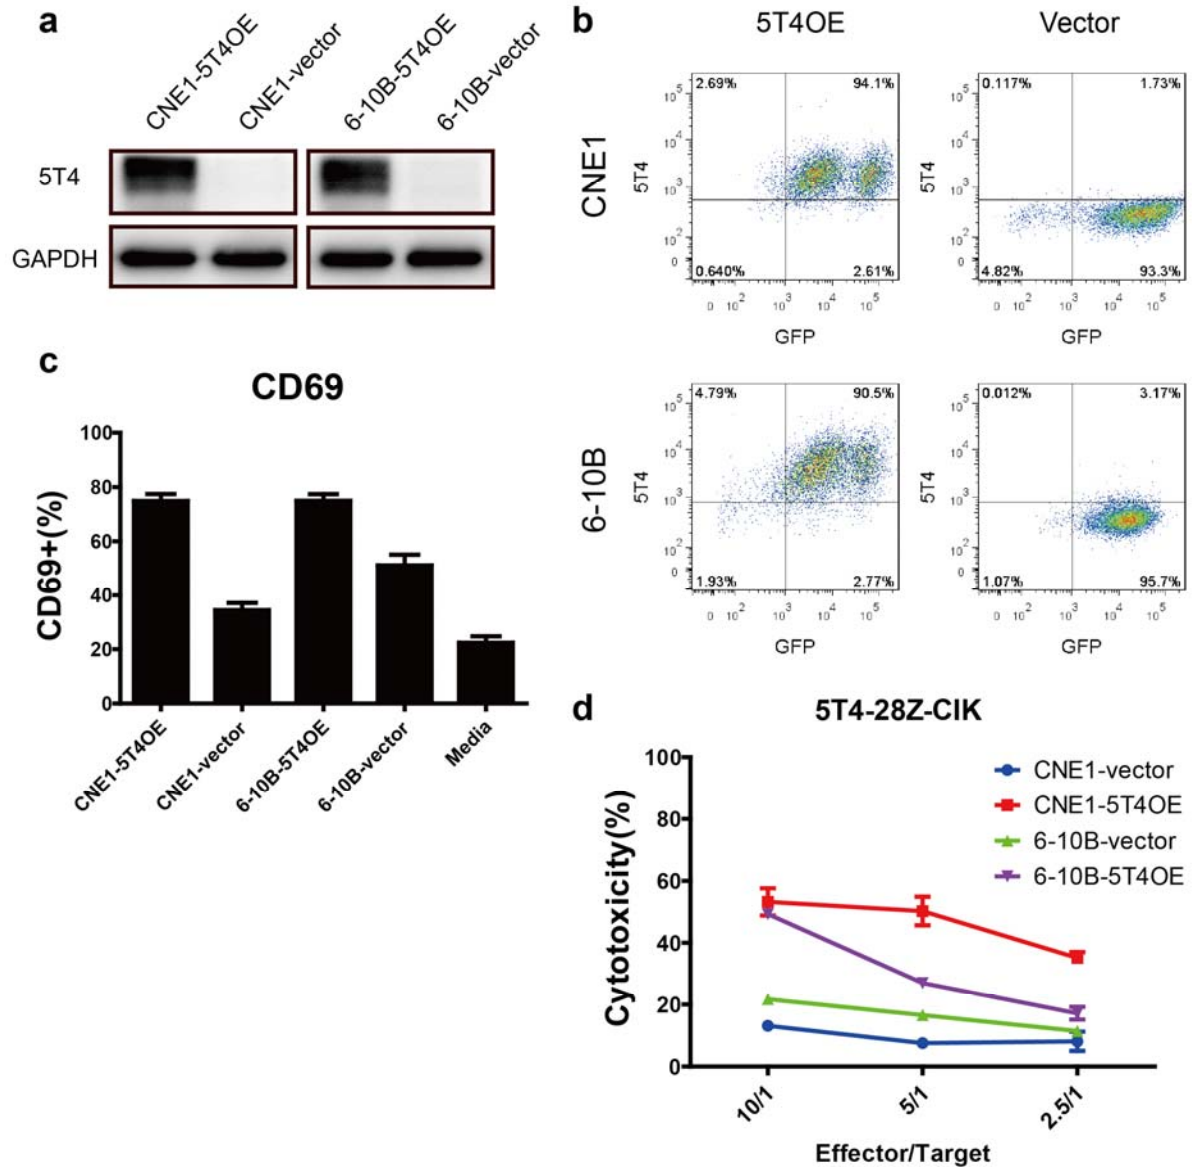

**Supplementary Figure S3. Over-expression of 5T4 on NPC cells promotes the activation and cytotoxicity of 5T4-28Z-CIK cells.** Stable transduction of 5T4 in 6-10B and CNE1 cell lines was confirmed using WB (a) and flow cytometry (b) with anti-h5T4 antibody. (c) Then,  $2 \times 10^5$  target cells per well were co-cultured with  $1 \times 10^6$  5T4-28Z-CIK cells per well for 24 h. Effector cells cultured alone served as the negative control. The expression of CD69 on effector cells was detected with flow cytometry using anti-hCD69-APC antibody. Values in the histogram represent the mean  $\pm$  SD of three parallel samples. (d) Next,  $1 \times 10^4$  target cells per well were co-cultured with 5T4-28Z-CIK cells at E/T ratios of 10/1, 5/1 and 2.5/1 for 4 h. The cytotoxicity of effector cells was examined with LDH release assays. Values in the line graphs represent the mean  $\pm$  SD of three parallel wells.

**Supplementary Video S1. 5T4-28Z-CIK cells efficiently eliminate S26 NPC cells.** The video corresponds to the images displayed in Fig. 6g.

**Supplementary Video S2. 5T4-28Z-CIK cells discern and attack S26 Spheroid.** The video corresponds to the images displayed in Fig. 6g.

## **Supplementary methods**

**Cell lines.** Seven human NPC cell lines without Epstein-Barr virus (EBV) infection, including CNE1; SUNE1 and its sub-clones 5-8F, 6-10B; CNE2 and its sub-clones S18, S26; and the normal nasopharyngeal epithelial cell line NP69, were kindly provided by Prof. M.-S. Zeng (Sun Yat-sen University, Guangzhou, China). The EBV-positive NPC cell line HONE-1 was obtained from Prof. S.-W. Tsao (University of Hong Kong, Hong Kong, China). The NP69 cell line was maintained in keratinocyte serum-free medium (Gibco). All NPC cell lines and HEK293T cells were cultured in RPMI-1640 medium (Gibco) or DMEM (Gibco) supplemented with 10% FBS (HyClone) at 37°C under 5% CO<sub>2</sub>.

**RNA extraction, cDNA synthesis and real-time quantitative PCR.** The total RNA was extracted from cells using an RNAiso Plus kit (TAKARA) according to the manufacturer's protocol. Each cDNA was synthesized from 500 ng of total RNA using a PrimeScript™ RT reagent Kit (TAKARA) in accordance with the manufacturer's instructions. Then, each 10 ng of cDNA was used as a template for PCR amplification with an SYBR® Premix Ex Taq™ II kit (TAKARA). The PCR was performed for 40 cycles of 5 s at 95°C and 35 s at 60°C, using an Mx3000PTM real-time PCR system (Stratagene). The level of gene expression was determined by the comparative cycle threshold method ( $2^{-\Delta C_t}$ ), in which *GAPDH* was used as the internal reference. Special primer pairs designed by Primer

Premier 6 (Premier Biosoft) were used and are shown as follows: *ROR1-F*, 5'-CAGTCAGTGCTGAATTAGTGCC-3'; *ROR1-R*, 5'-TCATCGAGGGTCAGGTAAGAAT-3'; *5T4-F*, 5'-CGCTACTCTGGTGGAAGTCA-3'; *5T4-R*, 5'-ACCTCTTCGCCTCTTGTTGG-3'; *CAIX-F*, 5'-CTGCTGGTGACATCCTAGCC-3'; *CAIX-R*, 5'-CTCCAGTCTCGGCTACCTCT-3'; *GAPDH-F*, 5'-ACAACCTTGGTATCGTGGAAGG-3'; and *GAPDH-R*, 5'-GCCATCACGCCACAGTTTC-3'.

**Western blotting.** NPC cells and their spheroids were lysed in RIPA lysis buffer (Beyotime) supplemented with 1% protease inhibitor cocktail (Pierce) and incubated for 30 min on ice. Then, the suspensions were collected and centrifuged at 12,000 g and 4°C for 5 min, and the protein concentration of the supernatants was determined using a BCA protein assay kit (Beyotime) according to the operating manual. The cell lysates (30 µg per lane) were separated on 10% polyacrylamide gels by SDS-PAGE under reducing conditions and then transferred onto a 0.45 µm PVDF membrane (Millipore). Then, the membrane was blocked with 5% BSA-TBS-Tween 20 at room temperature for 1 h and incubated with the appropriately diluted specific primary antibodies overnight at 4°C. After five washes with 0.1% TBS-Tween 20, the membranes were incubated with HRP-conjugated secondary antibodies at room temperature for 2 h, followed by five additional washes with 0.1% TBS-Tween 20. Finally, the bands were detected using a ChemiDoc XRS+ imaging system (Bio-Rad) with a BeyoECL Star Kit (Beyotime).

**Flow cytometric analysis.** For cell surface staining, 10<sup>6</sup> cells were washed with PBS and resuspended in 100 µl of 2% FBS-PBS. Then, fluorochrome-conjugated antibodies or matched isotype control antibodies were added into the suspension and incubated at 4°C for 30 min. Subsequently, the cells

were washed twice with 2% FBS-PBS prior to analysis on BD LSRFortessa™ system. Flowjo software v7.6.1 (Tree star) was used for data analysis.

**Immunofluorescence.** SUNE1 cells seeded on coverslips were washed with PBS and fixed with 4% paraformaldehyde for 20 min. Then, the coverslips were blocked with 5% BSA-PBS for 30 min at room temperature and incubated with rabbit anti-h5T4 antibody (1/100, clone EPR5529, Abcam) overnight at 4°C. The cells were then rinsed in PBS containing 0.05% Tween-20 three times and stained with FITC-conjugated goat anti-rabbit secondary antibody (1/100, BD) for 1 h in the dark at room temperature. After three washes in 0.05% PBS-T, the cells were counterstained with 4',6-diamidino-2-phenylindole (DAPI, Beyotime) and preserved in the mounting medium. Images were captured under an inverted fluorescence microscope (Zeiss Observer Z1) with a 63×/1.4 numerical aperture oil immersion objective, and representative pictures from Z-axis sections were overlapped using ZEN2011 software (Zeiss). For the negative control, coverslips were incubated in 1% BSA-PBS instead of primary antibody.

**Generation of 5T4 stably expressing NPC cells.** Human 5T4 cDNA was cloned into a pHBLV-CMVIE-ZsGreen-T2A-Luciferase vector and transduced into 5T4<sup>dim/-</sup> 6-10B cells and 5T4<sup>dim/-</sup> CNE1 cells using lentivirus. The stably transduced cells were sorted using FACS according to the GFP expression, and expression of 5T4 was verified using WB and flow cytometry with anti-h5T4 antibody. As the negative controls, 6-10B and CNE1 cells were transduced with vacant vectors.

**Functional assays.** In the CD69 assay,  $2 \times 10^5$  target cells (6-10B-5T4OE, 6-10B-vector, CNE1-5T4OE, CNE1-vector) per well were co-cultured with  $1 \times 10^6$  5T4-28Z-CIK cells per well at 37°C under 5% CO<sub>2</sub>. All samples were set in triplicate. After incubation for 24 h, cells were collected,

stained with anti-CD69-APC antibody or matched isotype control antibody (Pharmingen, BD) and monitored using FACS. A cytotoxicity assay was performed in the same manner as mentioned in the Methods section.
